# Supplementary material for: Naphthalene-based semiconducting microporous polyimides for high-efficiency photo-catalytic dye degradation
Source: Royal Society of Chemistry journal article supplement (doi:10.1039/d3py00814b), 2023-01-01
Supplement: d3py00814b8.pdf [file d3py00814b8.pdf]

## Supporting Information

### Naphthalene-based semiconducting microporous polyimides for high-efficiency photo-catalytic dye degradation

Yujie Lei, Bo Lin, Jieyao Wang, Wangzhi Chen, Xiaoxuan Dai, Xingyu Ma, Lei Li\*  
College of Materials, Xiamen University, Xiamen, 361005, P. R. China.

#### Characterization

Table S1. Elemental analysis of MPIs.

| Samples | Theoretical value (wt %) |       |      | Experimental value (wt %) |      |      |
|---------|--------------------------|-------|------|---------------------------|------|------|
|         | C                        | N     | H    | C                         | N    | H    |
| NDH-P   | 73.35                    | 8.77  | 2.84 | 64.17                     | 7.56 | 1.64 |
| NDH-B   | 77.25                    | 6.00  | 3.00 | 68.38                     | 4.72 | 5.32 |
| NDH-T   | 71.79                    | 11.97 | 2.56 | 61.50                     | 9.58 | 2.79 |

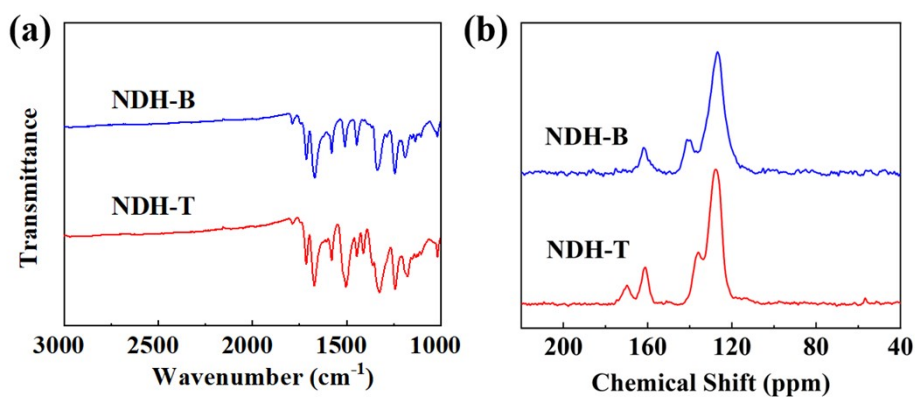

**Figure S1.** (a) FT-IR spectra of NDH-B and NDH-T. (b)  $^{13}\text{C}$ -CP/MAS NMR spectra of NDH-B and NDH-T.

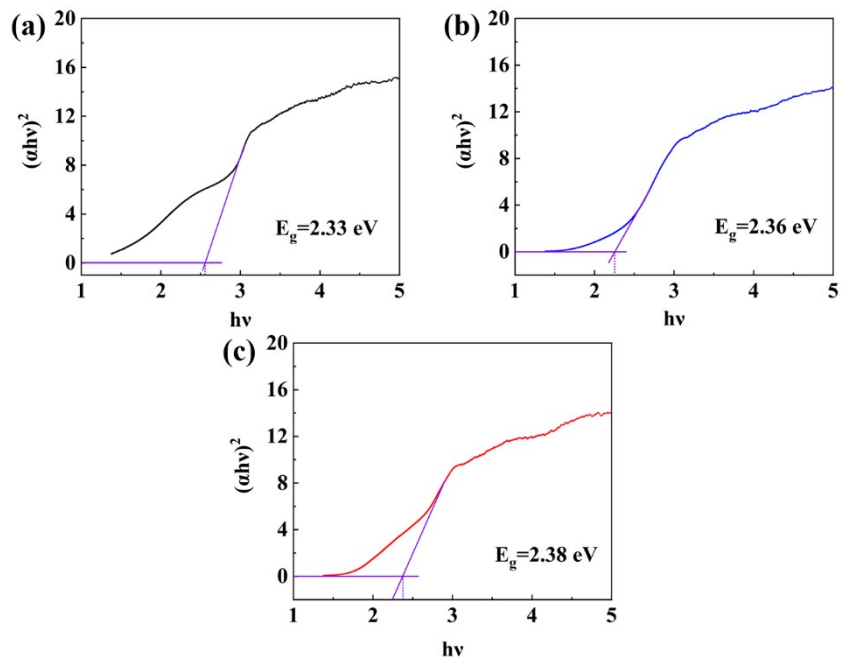

**Figure S2.** Kubelka-Munk-transformed reflectance spectra of (a) NDH-P, (b) NDH-B and (c) NDH-T.

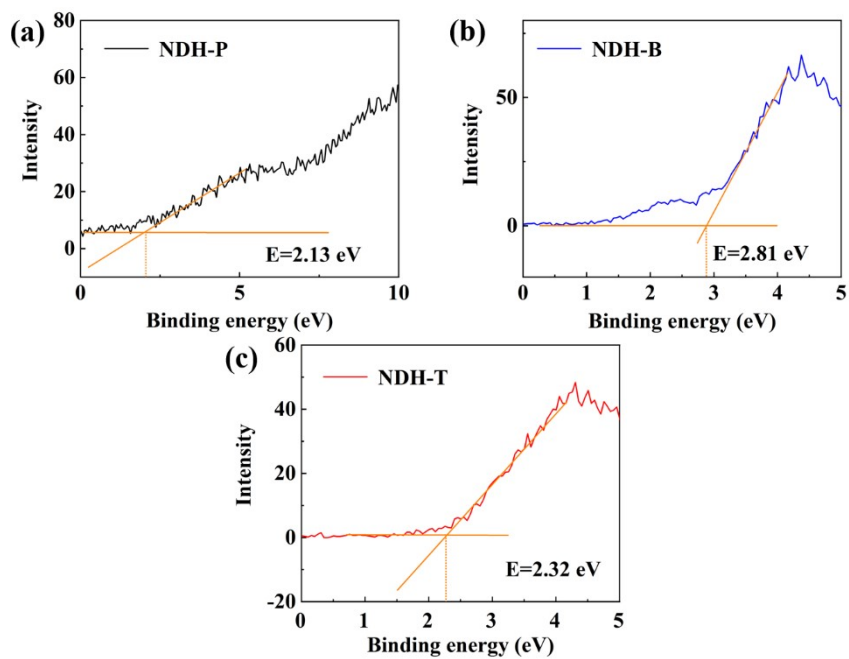

**Figure S3.** VB-XPS spectra of (a) NDH-P, (b) NDH-B and (c) NDH-T.

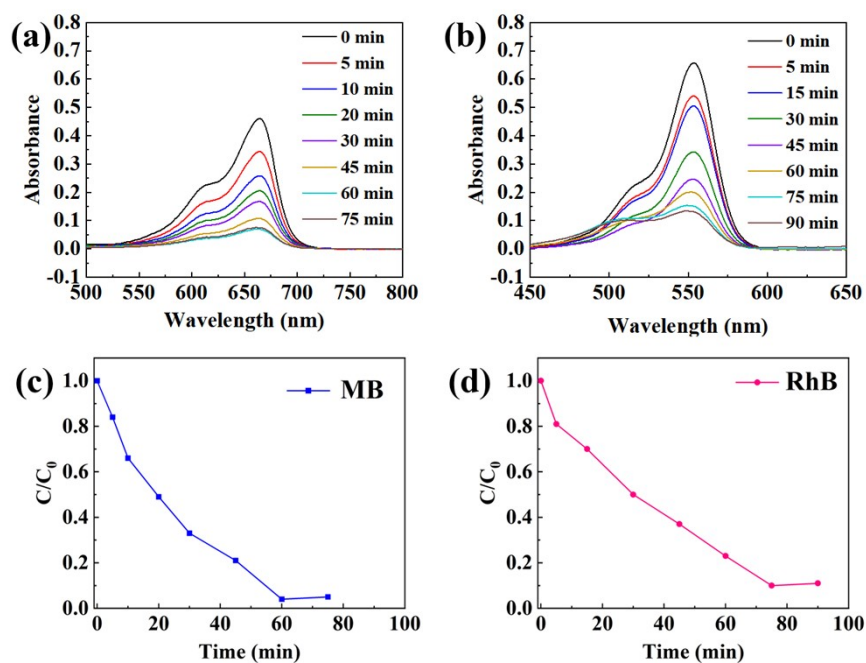

**Figure S4.** Time-dependant UV-vis absorption spectra of (a) MB and (b) RhB photo-degradation catalyzed with NDH-B. Concentration variation of (c) MB and (d) RhB with visible light irradiation time in the presence of NDH-B.

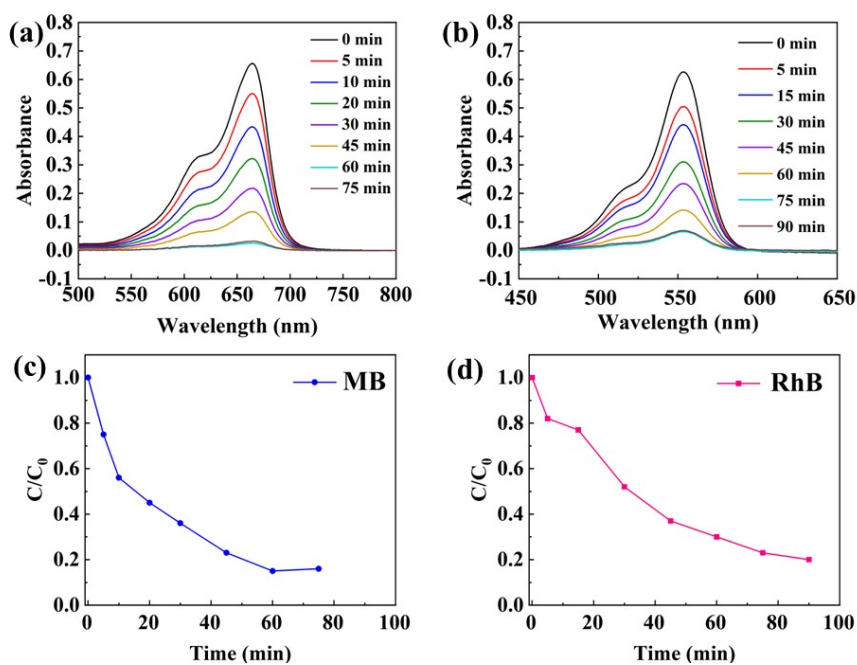

**Figure S5.** Time-dependant UV-vis absorption spectra of (a) MB and (b) RhB photo-degradation catalyzed with NDH-T. Concentration variation of (c) MB and (d) RhB with visible light irradiation time in the presence of NDH-T.

**Table S2.** Photo-catalytic activities of MPIs compared with reported polymer-based catalysts for photo-degradation of dyes.

| Polymers                        | BET surface areas (m <sup>2</sup> g <sup>-1</sup> ) | Dyes | Photo-degradation time (min) | Photo-degradation efficiency (%) | References       |        |
|---------------------------------|-----------------------------------------------------|------|------------------------------|----------------------------------|------------------|--------|
| NDH-P                           | 1909                                                | MB   | 50                           | 97                               | <b>this work</b> |        |
|                                 |                                                     | RhB  | 60                           | 90                               |                  |        |
| NDH-B                           | 885                                                 | MB   | 60                           | 96                               |                  |        |
|                                 |                                                     | RhB  | 75                           | 90                               |                  |        |
| NDH-T                           | 1086                                                | MB   | 60                           | 85                               |                  |        |
|                                 |                                                     | RhB  | 75                           | 80                               |                  |        |
| Fe-TiO <sub>2</sub> @COF        | 230                                                 | MB   | 240                          | 96                               |                  | Ref 26 |
| TP-COP                          | 58                                                  | RhB  | 160                          | 95                               |                  | Ref 27 |
| COP-NT                          | 48                                                  | MB   | 100                          | 57                               |                  | Ref 28 |
|                                 |                                                     | RhB  | 240                          | 78                               |                  |        |
| NH <sub>2</sub> -MIL-68@TPA-COF | 539                                                 | RhB  | 40                           | >98                              | Ref 29           |        |
| Py-BF-CMP                       | 1306                                                |      | 90                           | 98                               | Ref 30           |        |
| TPE-BF-CMP                      | 777                                                 | RhB  | 90                           | 77                               |                  |        |
| TPA-BF-CMP                      | 590                                                 |      | 90                           | 77                               |                  |        |

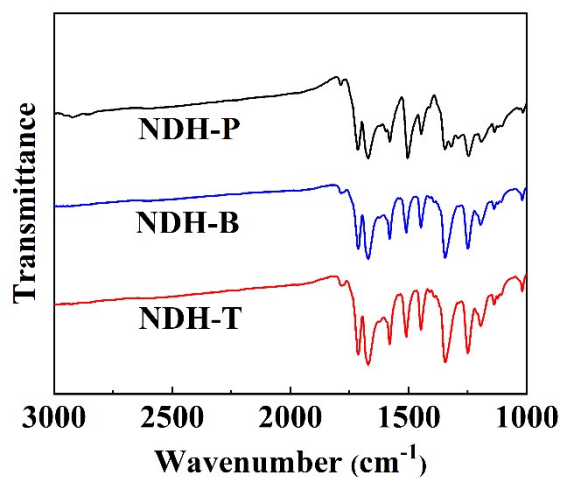

**Figure S6.** FT-IR spectra of MPIs after 5 cycles.

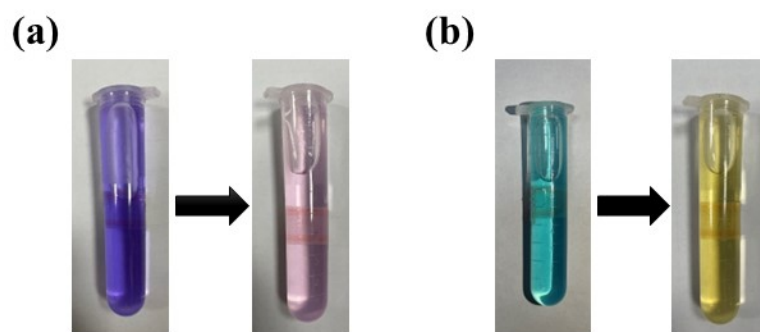

**Figure S7.** Digital photos of (a) MB + RhB and (b) MB + MO before and after photodegradation.
